# Supplementary material for: Tofacitinib for the treatment of ankylosing spondylitis: a phase III, randomised, double-blind, placebo-controlled study
Source: PubMed Central journal article supplement — Ann Rheum Dis. 2021 Apr 27;80(8):1004–13. doi: 10.1136/annrheumdis-2020-219601 (PMC8292568; doi:10.1136/annrheumdis-2020-219601), 2021-04-27
Supplement: annrheumdis-2020-219601supp001.pdf [file annrheumdis-2020-219601supp001.pdf]

**Online supplementary figure S1** Efficacy of tofacitinib 5 mg BID vs placebo at Week 16: (A) ASAS20 response<sup>a</sup> and (B) ASAS40 response,<sup>a</sup> stratified by bDMARD treatment history.<sup>b</sup>

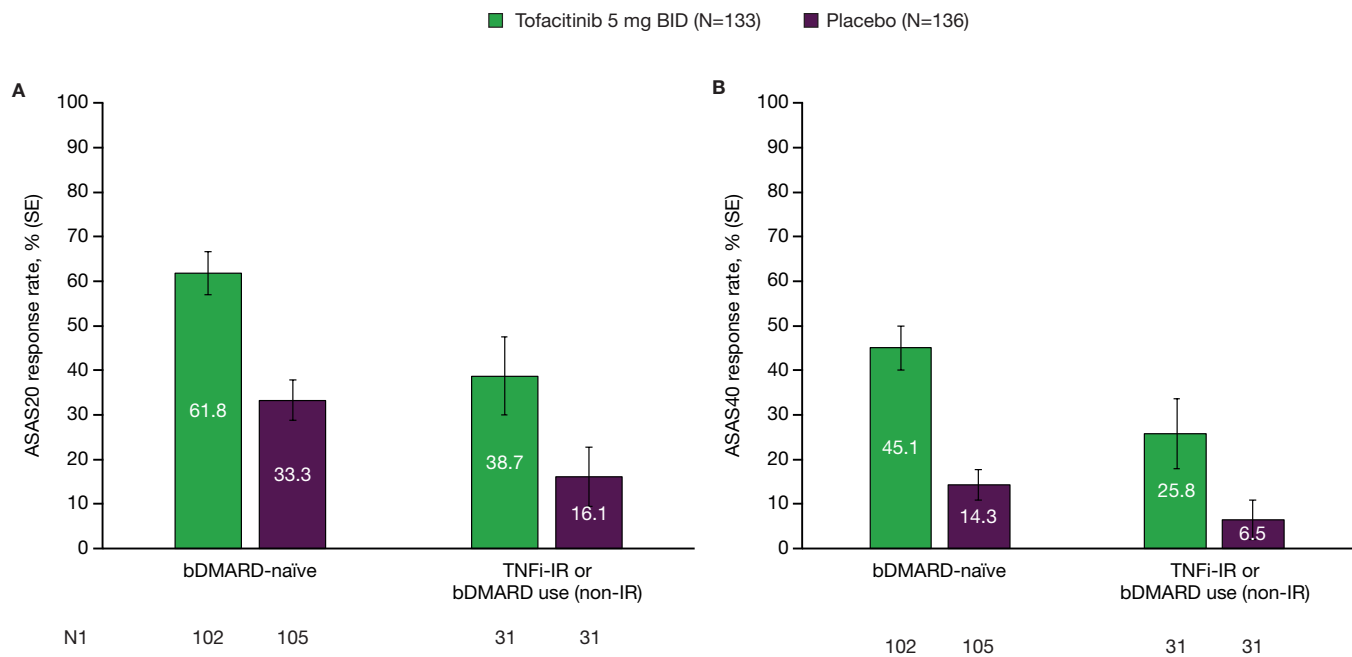

Data are from the Week 16 analysis: data cut-off 19 December 2019; data snapshot 29 January 2020. <sup>a</sup>Normal approximation was used. Missing response was considered as non-response. <sup>b</sup>bDMARD treatment history was derived from the clinical database. ASAS, Assessment of SpondyloArthritis international Society; bDMARD, biologic disease-modifying antirheumatic drug; BID, twice daily; IR, inadequate response or intolerance; N, number of patients in full analysis set; N1, number of patients in full analysis set, stratified by bDMARD treatment history; SE, standard error; TNFi, tumour necrosis factor inhibitor.

**Online supplementary figure S2** Efficacy of tofacitinib 5 mg BID vs placebo→tofacitinib 5 mg BID<sup>a</sup> for ASAS components over time up to Week 48: (A)  $\Delta$ PtGA,<sup>b</sup> (B)  $\Delta$ total back pain,<sup>b</sup> (C)  $\Delta$ BASFI<sup>b</sup> and (D)  $\Delta$ morning stiffness (inflammation; mean of questions 5 and 6 of the BASDAI).<sup>b</sup>

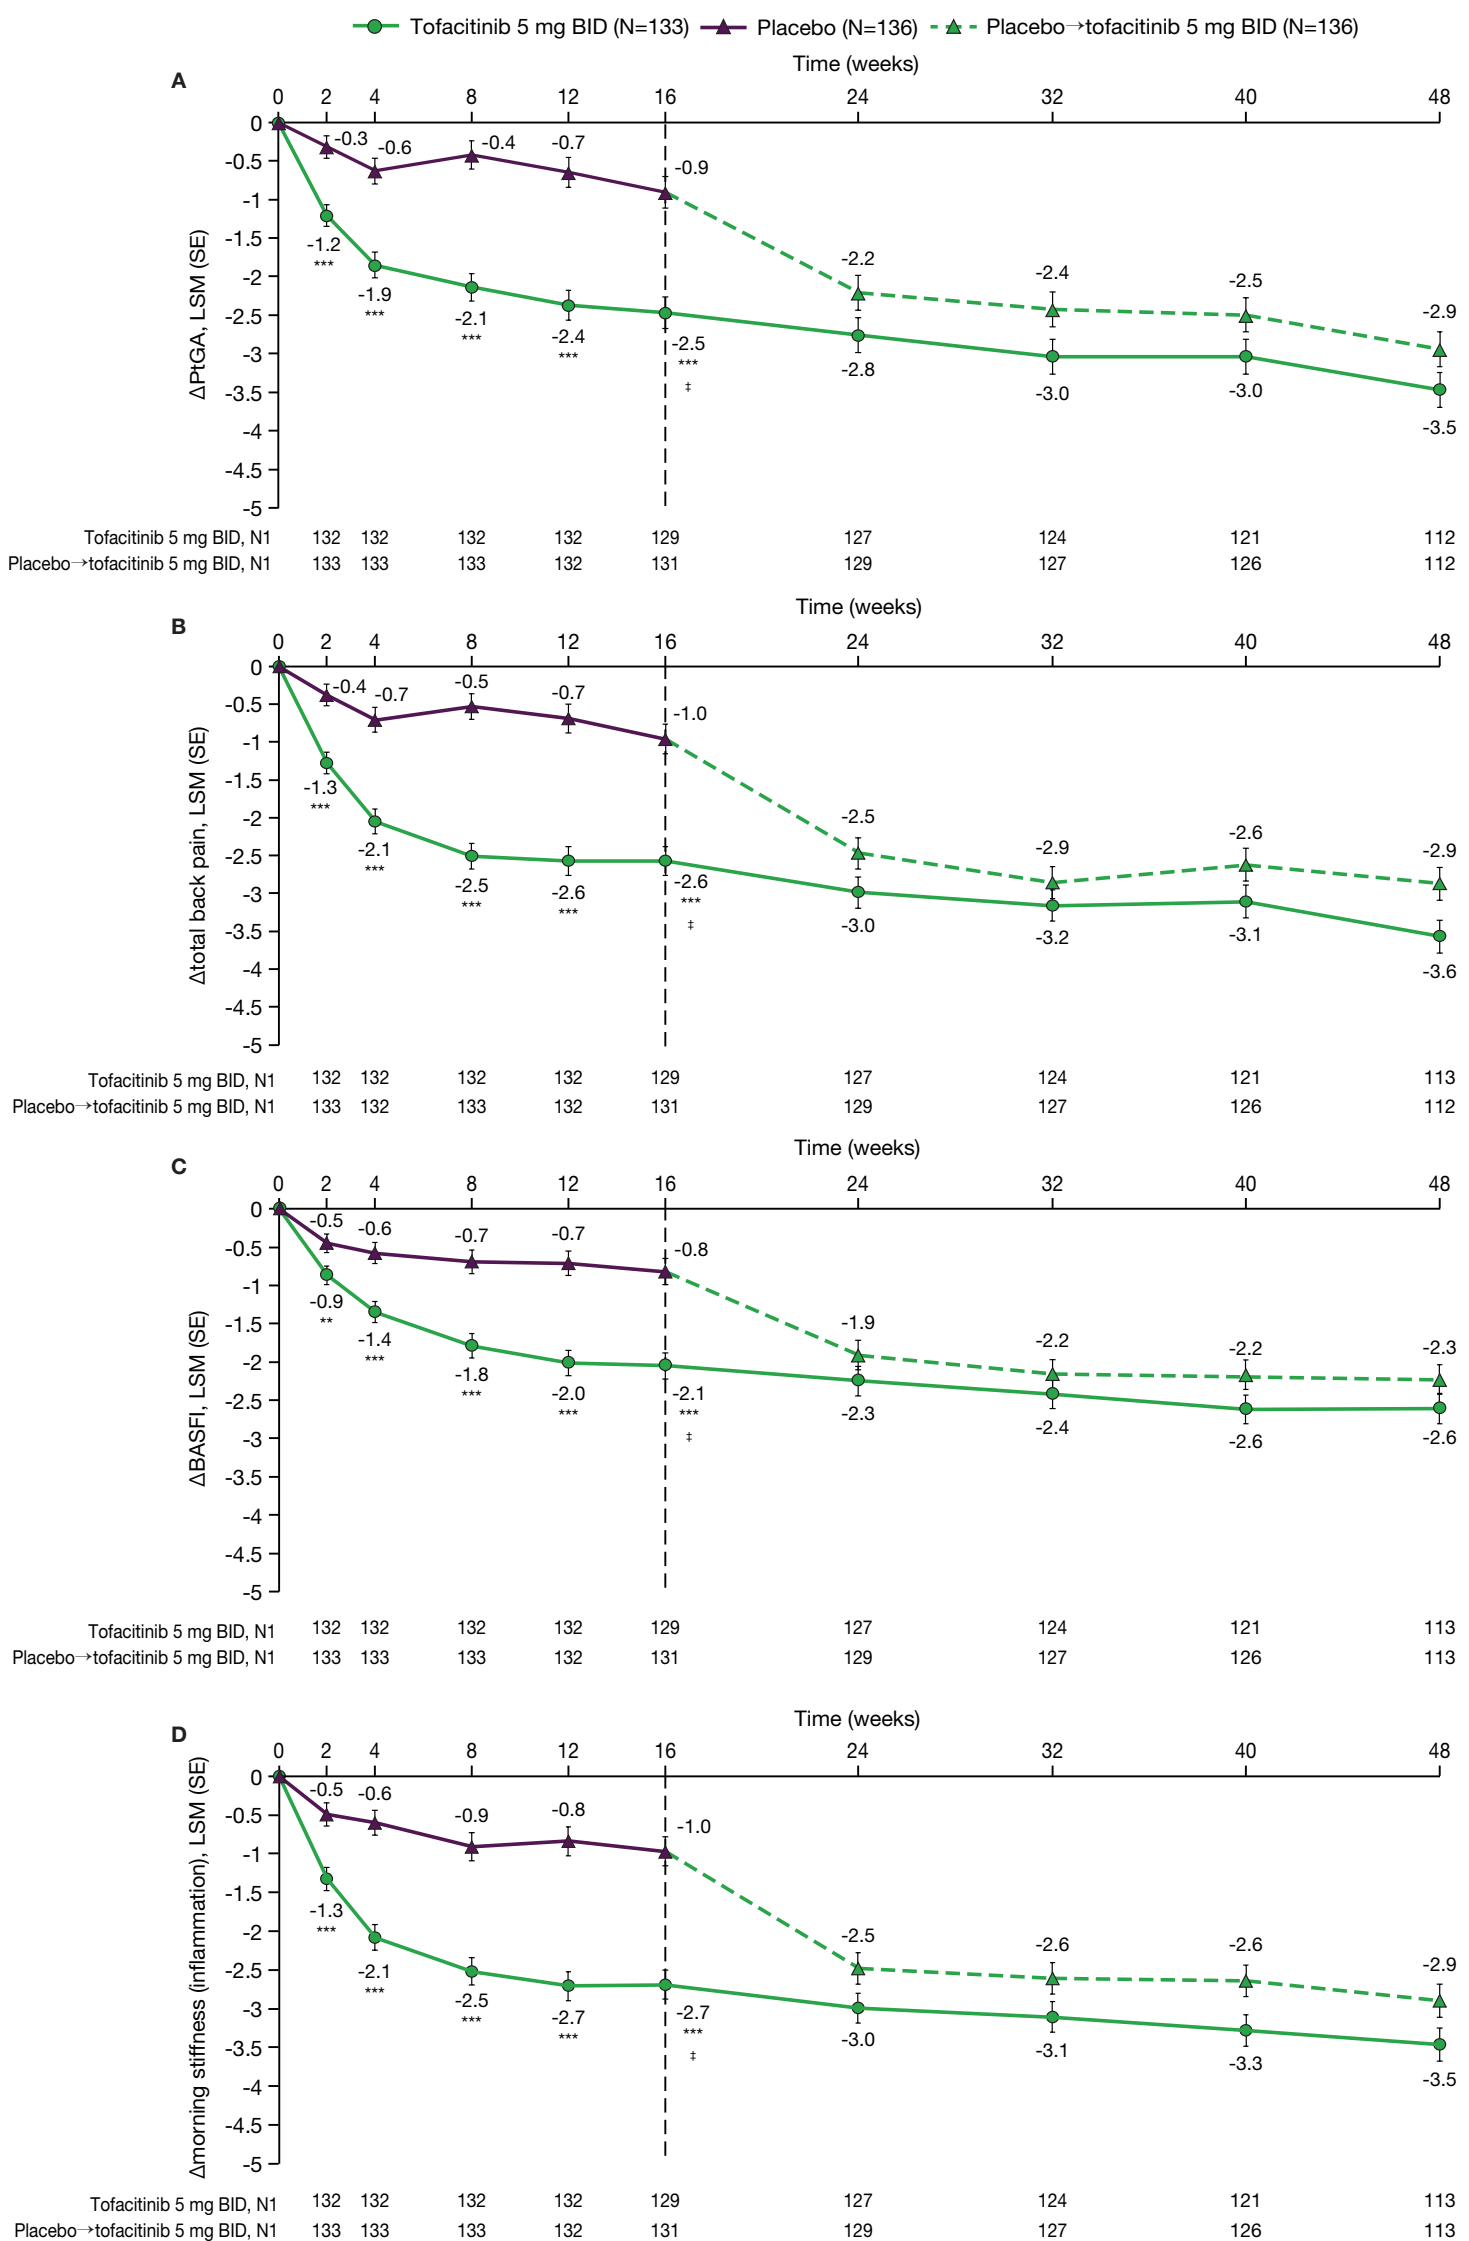

Data up to Week 16 are from the Week 16 analysis: data cut-off 19 December 2019; data snapshot 29 January 2020. Data for Weeks 24–48 are from the Week 48 final analysis. \*\* $p < 0.01$ , \*\*\* $p < 0.001$  for comparing tofacitinib 5 mg BID vs placebo.  $^{\dagger}p \leq 0.05$  for comparing tofacitinib 5 mg BID vs placebo, according to the pre-specified step-down testing procedure for type I error-control of ASAS components. <sup>a</sup>Patients receiving placebo advanced to tofacitinib 5 mg BID at Week 16 (dashed line). <sup>b</sup>Mixed model for repeated measures included fixed effects of treatment group, visit, treatment-group-by-visit interaction, stratification factor (bDMARD treatment history: bDMARD-naïve vs TNFi-IR or prior bDMARD use without IR) derived from the clinical database, stratification-factor-by-visit interaction, baseline value and baseline-value-by-visit interaction. The model used a common unstructured variance-covariance matrix, without imputation for missing values. Two separate models were used. In the analyses of results through the first 16 weeks, the data cut-off of 19 December 2019 was used; the results through Week 16 are from this model. In the analyses of the results through Week 48 (including all post-baseline data through Week 48), the Week 48 final data were used; the results from Week 24 through Week 48 are from this model.  $\Delta$ , change from baseline; BASDAI, Bath Ankylosing Spondylitis Disease Activity Index; BASFI, Bath Ankylosing Spondylitis Functional Index; bDMARD, biologic disease-modifying antirheumatic drug; BID, twice daily; IR, inadequate response or intolerance; LSM, least squares mean; N, number of patients in full analysis set; N1, number of patients with observation at visit; PtGA, Patient Global Assessment of Disease Activity; SE, standard error; TNFi, tumour necrosis factor inhibitor.

**Online supplementary figure S3** Efficacy of tofacitinib 5 mg BID vs placebo→tofacitinib 5 mg BID<sup>a</sup> over time up to Week 48: (A) ASAS partial remission<sup>b</sup> and (B) ASAS 5/6 response.<sup>b</sup>

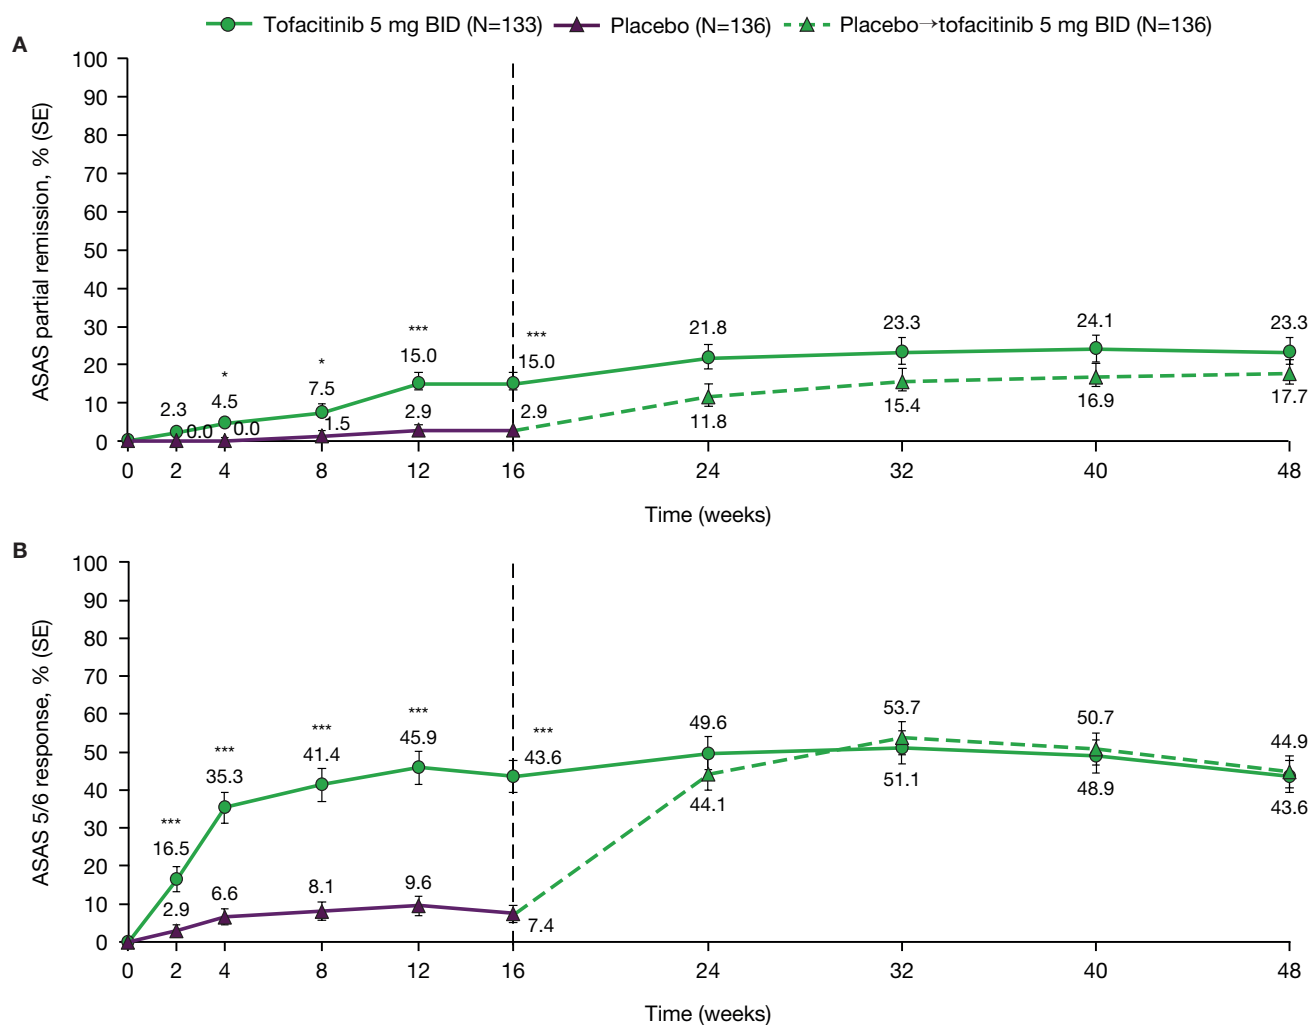

Data up to Week 16 are from the Week 16 analysis: data cut-off 19 December 2019; data snapshot 29 January 2020. Data for Weeks 24–48 are from the Week 48 final analysis. \* $p < 0.05$ , \*\*\* $p < 0.001$  for comparing tofacitinib 5 mg BID vs placebo. <sup>a</sup>Patients receiving placebo advanced to tofacitinib 5 mg BID at Week 16 (dashed line). <sup>b</sup>Normal approximation adjusting for the stratification factor (bDMARD treatment history: bDMARD-naïve vs TNFi-IR or prior bDMARD use without IR) derived from the clinical database via the Cochran–Mantel–Haenszel approach was used. Missing response was considered as non-response. ASAS, Assessment of SpondyloArthritis international Society; bDMARD, biologic disease-modifying antirheumatic drug; BID, twice daily; IR, inadequate response or intolerance; N, number of patients in full analysis set; SE, standard error; TNFi, tumour necrosis factor inhibitor.

**Online supplementary figure S4** Efficacy of tofacitinib 5 mg BID vs placebo→tofacitinib 5 mg BID<sup>a</sup> over time up to Week 48: (A) ASDAS clinically important improvement,<sup>b,c</sup> (B) ASDAS major improvement,<sup>b,d</sup> (C) ASDAS LDA<sup>b,e</sup> and (D) ASDAS inactive disease.<sup>b,f</sup>

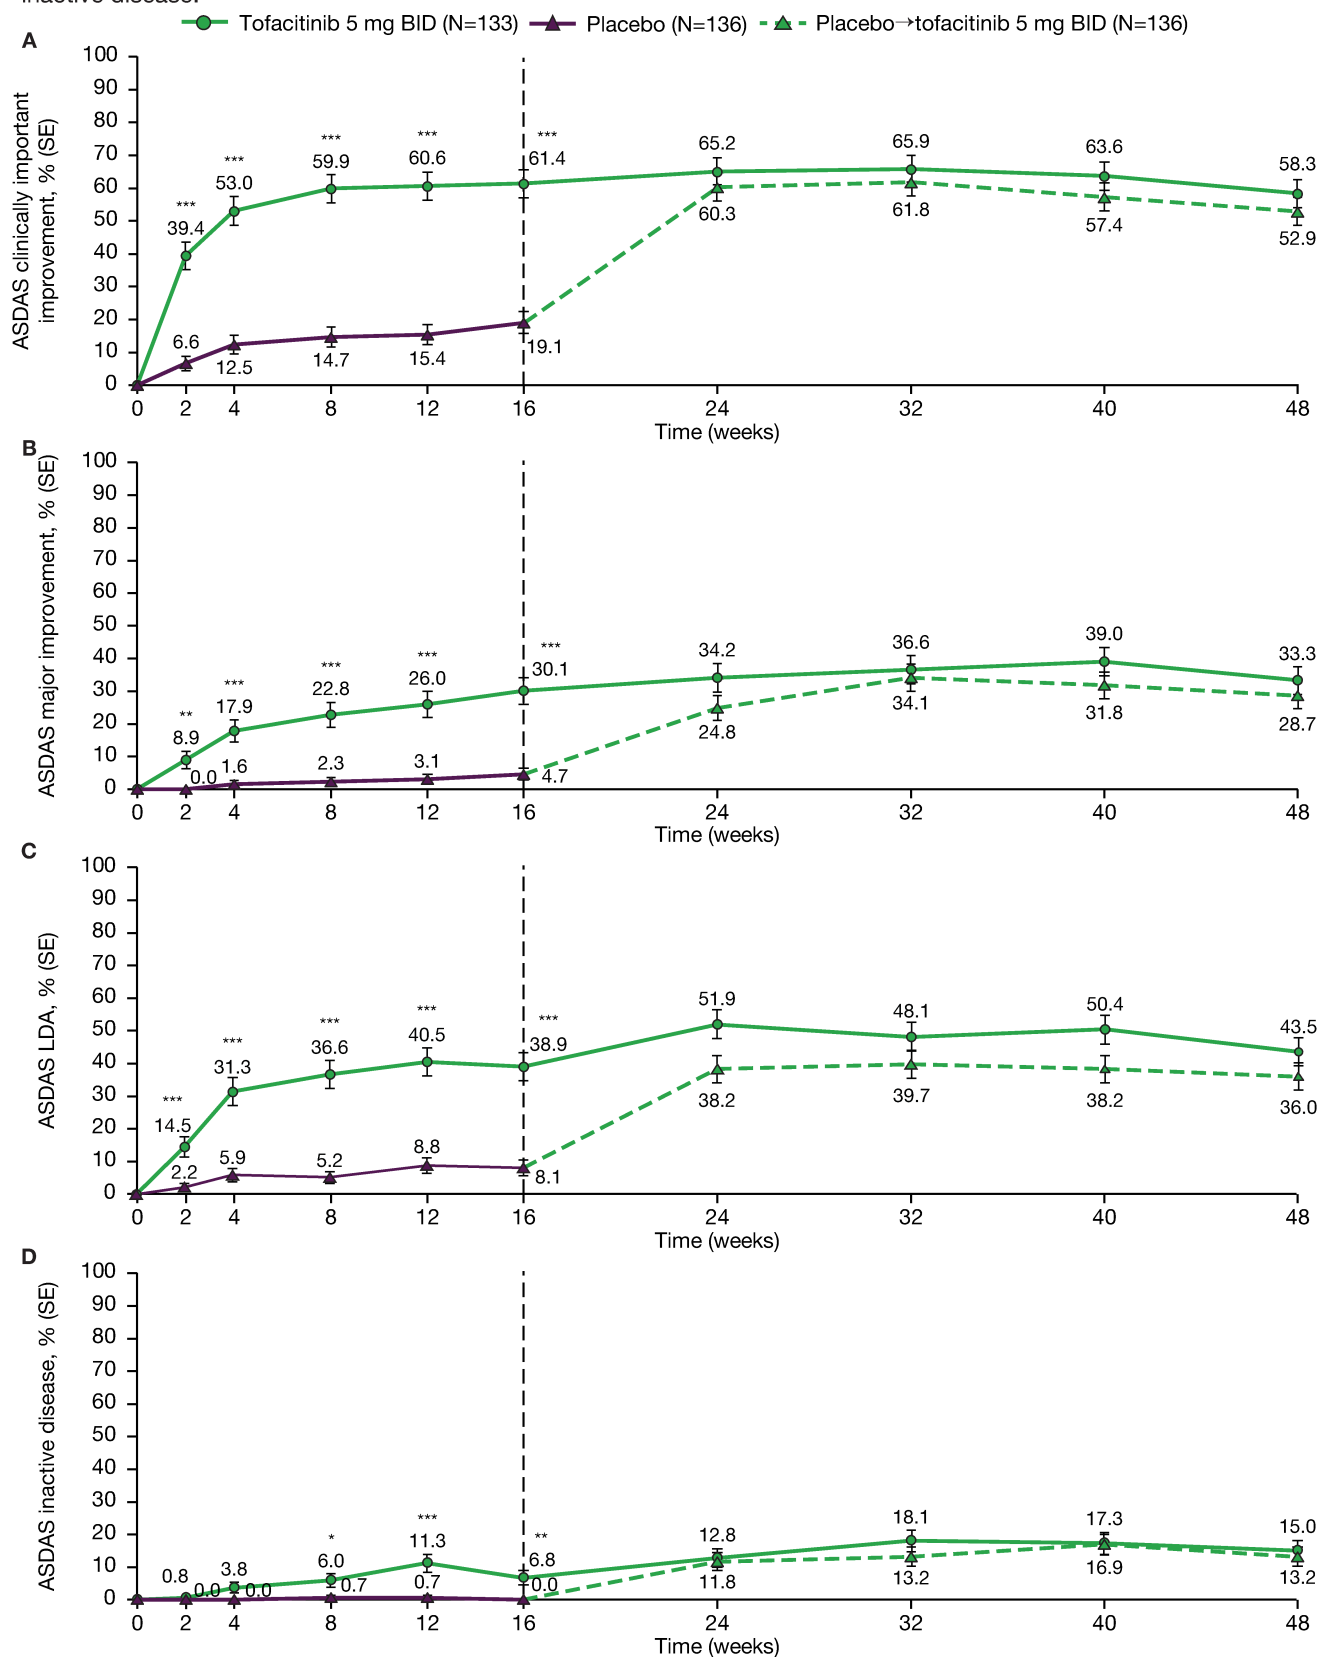

Data up to Week 16 are from the Week 16 analysis: data cut-off 19 December 2019; data snapshot 29 January 2020. Data for Weeks 24-48 are from the Week 48 final analysis. \* $p \leq 0.05$ , \*\* $p < 0.01$ , \*\*\* $p < 0.001$  for comparing tofacitinib 5 mg BID vs placebo. <sup>a</sup>Patients receiving placebo advanced to tofacitinib 5 mg BID at Week 16 (dashed line). <sup>b</sup>Normal approximation adjusting for the stratification factor (bDMARD treatment history: bDMARD-naïve vs TNFi-IR or prior bDMARD use without IR) derived from the clinical database via the Cochran–Mantel–Haenszel approach was used. Missing response was considered as non-response. <sup>c</sup>Analysed in patients with baseline ASDAS  $\geq 1.736$ : tofacitinib 5 mg BID, N1=132; placebo→tofacitinib 5 mg BID, N1=136. <sup>d</sup>Analysed in patients with baseline ASDAS  $\geq 2.636$ : tofacitinib 5 mg BID, N1=123; placebo→tofacitinib 5 mg BID, N1=129. <sup>e</sup>Analysed in patients with baseline ASDAS  $\geq 2.1$ : tofacitinib 5 mg BID, N1=131; placebo→tofacitinib 5 mg BID, N1=136. <sup>f</sup>Analysed in patients with baseline ASDAS  $\geq 1.3$ : tofacitinib 5 mg BID, N1=133; placebo→tofacitinib 5 mg BID, N1=136. ASDAS, Ankylosing Spondylitis Disease Activity Score using high-sensitivity C-reactive protein; bDMARD, biologic disease-modifying antirheumatic drug; BID, twice daily; IR, inadequate response or intolerance; LDA, low disease activity; N, number of patients in full analysis set; N1, number of patients who met the baseline ASDAS inclusion criterion for the analysis; SE, standard error; TNFi, tumour necrosis factor inhibitor.

**Online supplementary figure S5** Efficacy of tofacitinib 5 mg BID vs placebo→tofacitinib 5 mg BID<sup>a</sup> over time up to Week 48: (A)  $\Delta$ BASDAI<sup>b</sup> and (B) BASDAI50 response.<sup>c</sup>

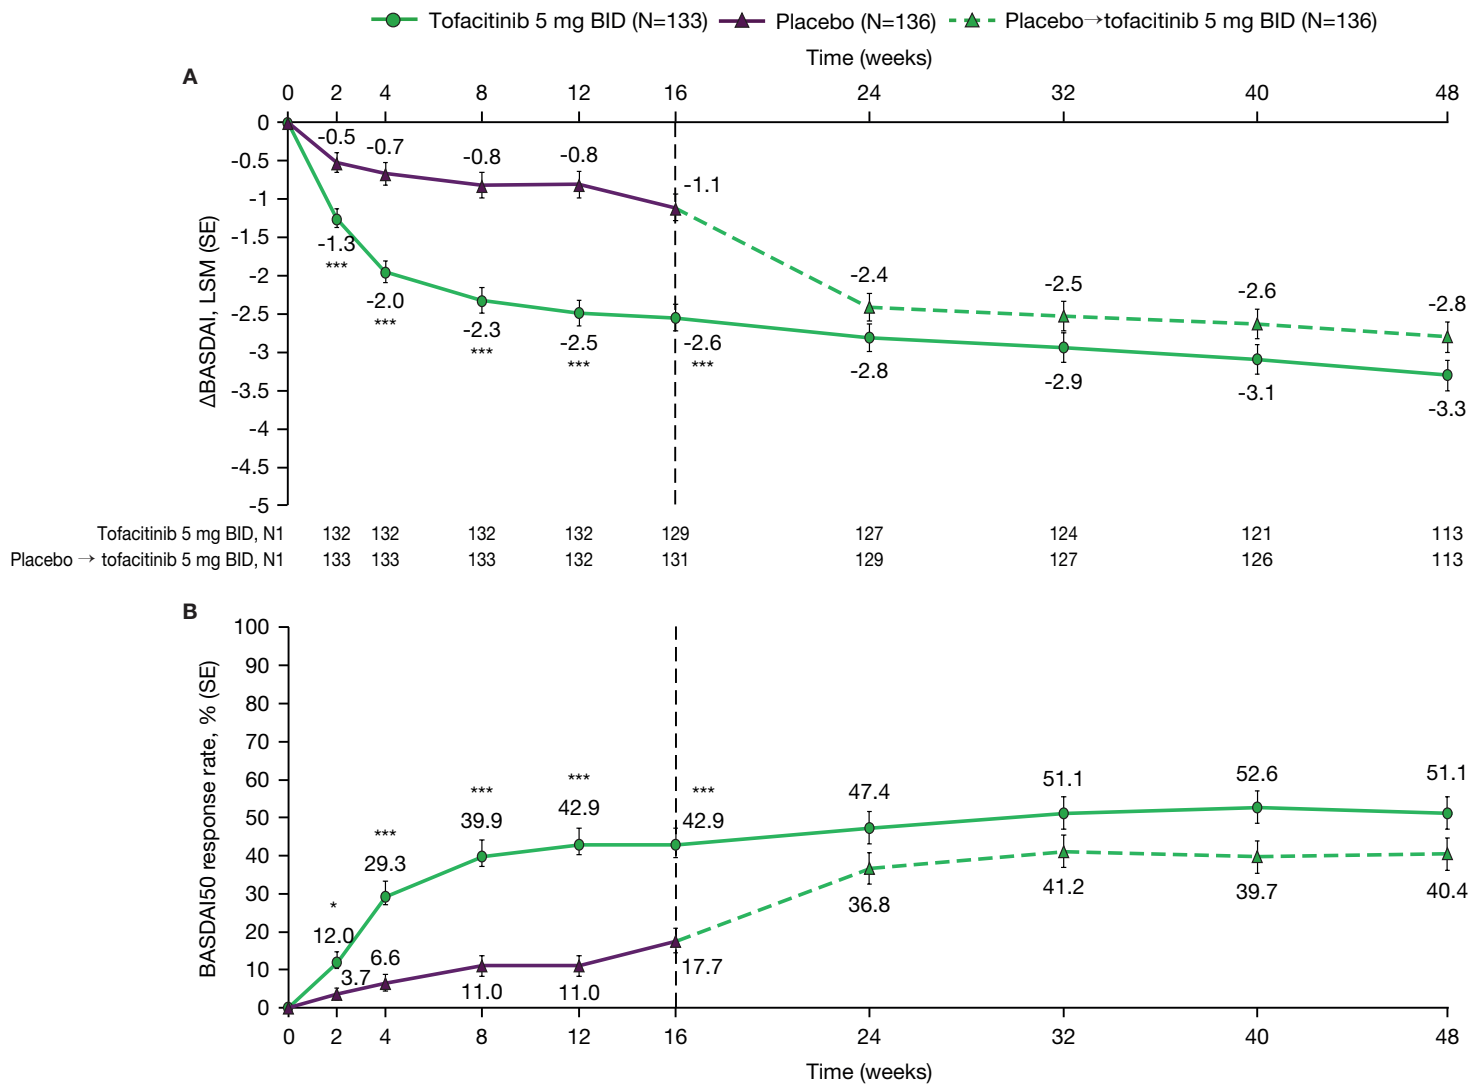

Data up to Week 16 are from the Week 16 analysis: data cut-off 19 December 2019; data snapshot 29 January 2020. Data for Weeks 24–48 are from the Week 48 final analysis. \* $p \leq 0.05$ , \*\*\* $p < 0.001$  for comparing tofacitinib 5 mg BID vs placebo. <sup>a</sup>Patients receiving placebo advanced to tofacitinib 5 mg BID at Week 16 (dashed line). <sup>b</sup>Mixed model for repeated measures included fixed effects of treatment group, visit, treatment-group-by-visit interaction, stratification factor (bDMARD treatment history: bDMARD-naïve vs TNFi-IR or prior bDMARD use without IR) derived from the clinical database, stratification-factor-by-visit interaction, baseline value and baseline-value-by-visit interaction. The model used a common unstructured variance-covariance matrix, without imputation for missing values. Two separate models were used. In the analyses of results through the first 16 weeks, the data cut-off of 19 December 2019 was used; the results through Week 16 are from this model. In the analyses of the results through Week 48 (including all post-baseline data through Week 48), the Week 48 final data were used; the results from Week 24 through Week 48 are from this model. <sup>c</sup>Normal approximation adjusting for the stratification factor derived from the clinical database via the Cochran–Mantel–Haenszel approach was used. Missing response was considered as non-response.  $\Delta$ , change from baseline; BASDAI, Bath Ankylosing Spondylitis Disease Activity Index; bDMARD, biologic disease-modifying antirheumatic drug; BID, twice daily; IR, inadequate response or intolerance; LSM, least squares mean; N, number of patients in full analysis set; N1, number of patients with observation at visit; SE, standard error; TNFi, tumour necrosis factor inhibitor.

**Online supplementary figure S6** Efficacy of tofacitinib 5 mg BID vs placebo→tofacitinib 5 mg BID<sup>a</sup> over time up to Week 48: (A)  $\Delta$ MASES<sup>b,c</sup> and (B)  $\Delta$ SJC(44)<sup>b,d</sup>.

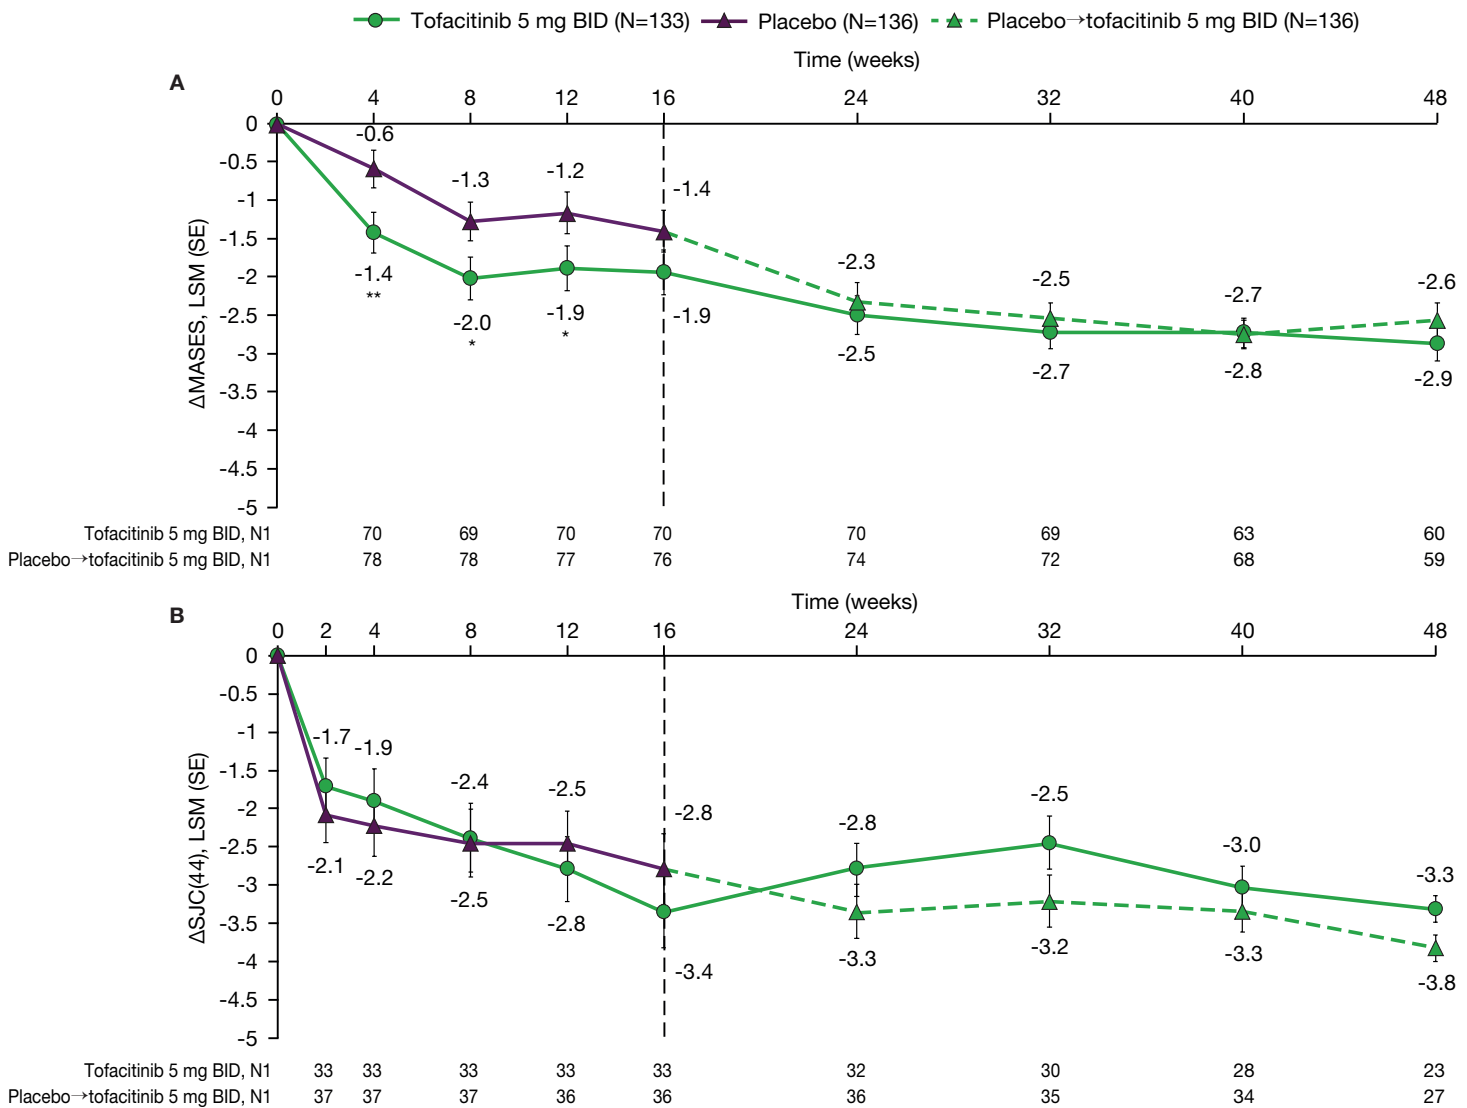

Data up to Week 16 are from the Week 16 analysis: data cut-off 19 December 2019; data snapshot 29 January 2020. Data for Weeks 24–48 are from the Week 48 final analysis. \* $p \leq 0.05$ , \*\* $p < 0.01$  for comparing tofacitinib 5 mg BID vs placebo. <sup>a</sup>Patients receiving placebo advanced to tofacitinib 5 mg BID at Week 16 (dashed line).

<sup>b</sup>Mixed model for repeated measures included fixed effects of treatment group, visit, treatment-group-by-visit interaction, stratification factor (bDMARD treatment history: bDMARD-naïve vs TNFi-IR or prior bDMARD use without IR) derived from the clinical database, stratification-factor-by-visit interaction, baseline value and baseline-value-by-visit interaction. The model used a common unstructured variance-covariance matrix, without imputation for missing values. Two separate models were used. In the analyses of results through the first 16 weeks, the data cut-off of 19 December 2019 was used; the results through Week 16 are from this model.

In the analyses of the results through Week 48 (including all post-baseline data through Week 48), the Week 48 final data were used; the results from Week 24 through Week 48 are from this model. <sup>c</sup>Analysed in patients with baseline MASES  $> 0$ . <sup>d</sup>Analysed in patients with baseline SJC(44)  $> 0$ .  $\Delta$ , change from baseline; bDMARD, biologic disease-modifying antirheumatic drug; BID, twice daily; IR, inadequate response or intolerance; LSM, least squares mean; MASES, Maastricht Ankylosing Spondylitis Enthesitis Score; N, number of patients in full analysis set; N1, number of patients with observation at visit; SE, standard error; SJC(44), swollen joint count in 44 joints; TNFi, tumour necrosis factor inhibitor.

Online supplementary figure S7 Efficacy of tofacitinib 5 mg BID vs placebo-tofacitinib 5 mg BID<sup>a</sup> over time up to Week 48: descriptive analyses of mean (A) ASDAS, (B) hsCRP (mg/dL), (C) BASMI, (D) FACIT-F total score, (E) PtGA, (F) total back pain, (G) BASFI, (H) morning stiffness (inflammation), (I) BASDAI, (J) MASES,<sup>b</sup> (K) SJC(44).<sup>c</sup>

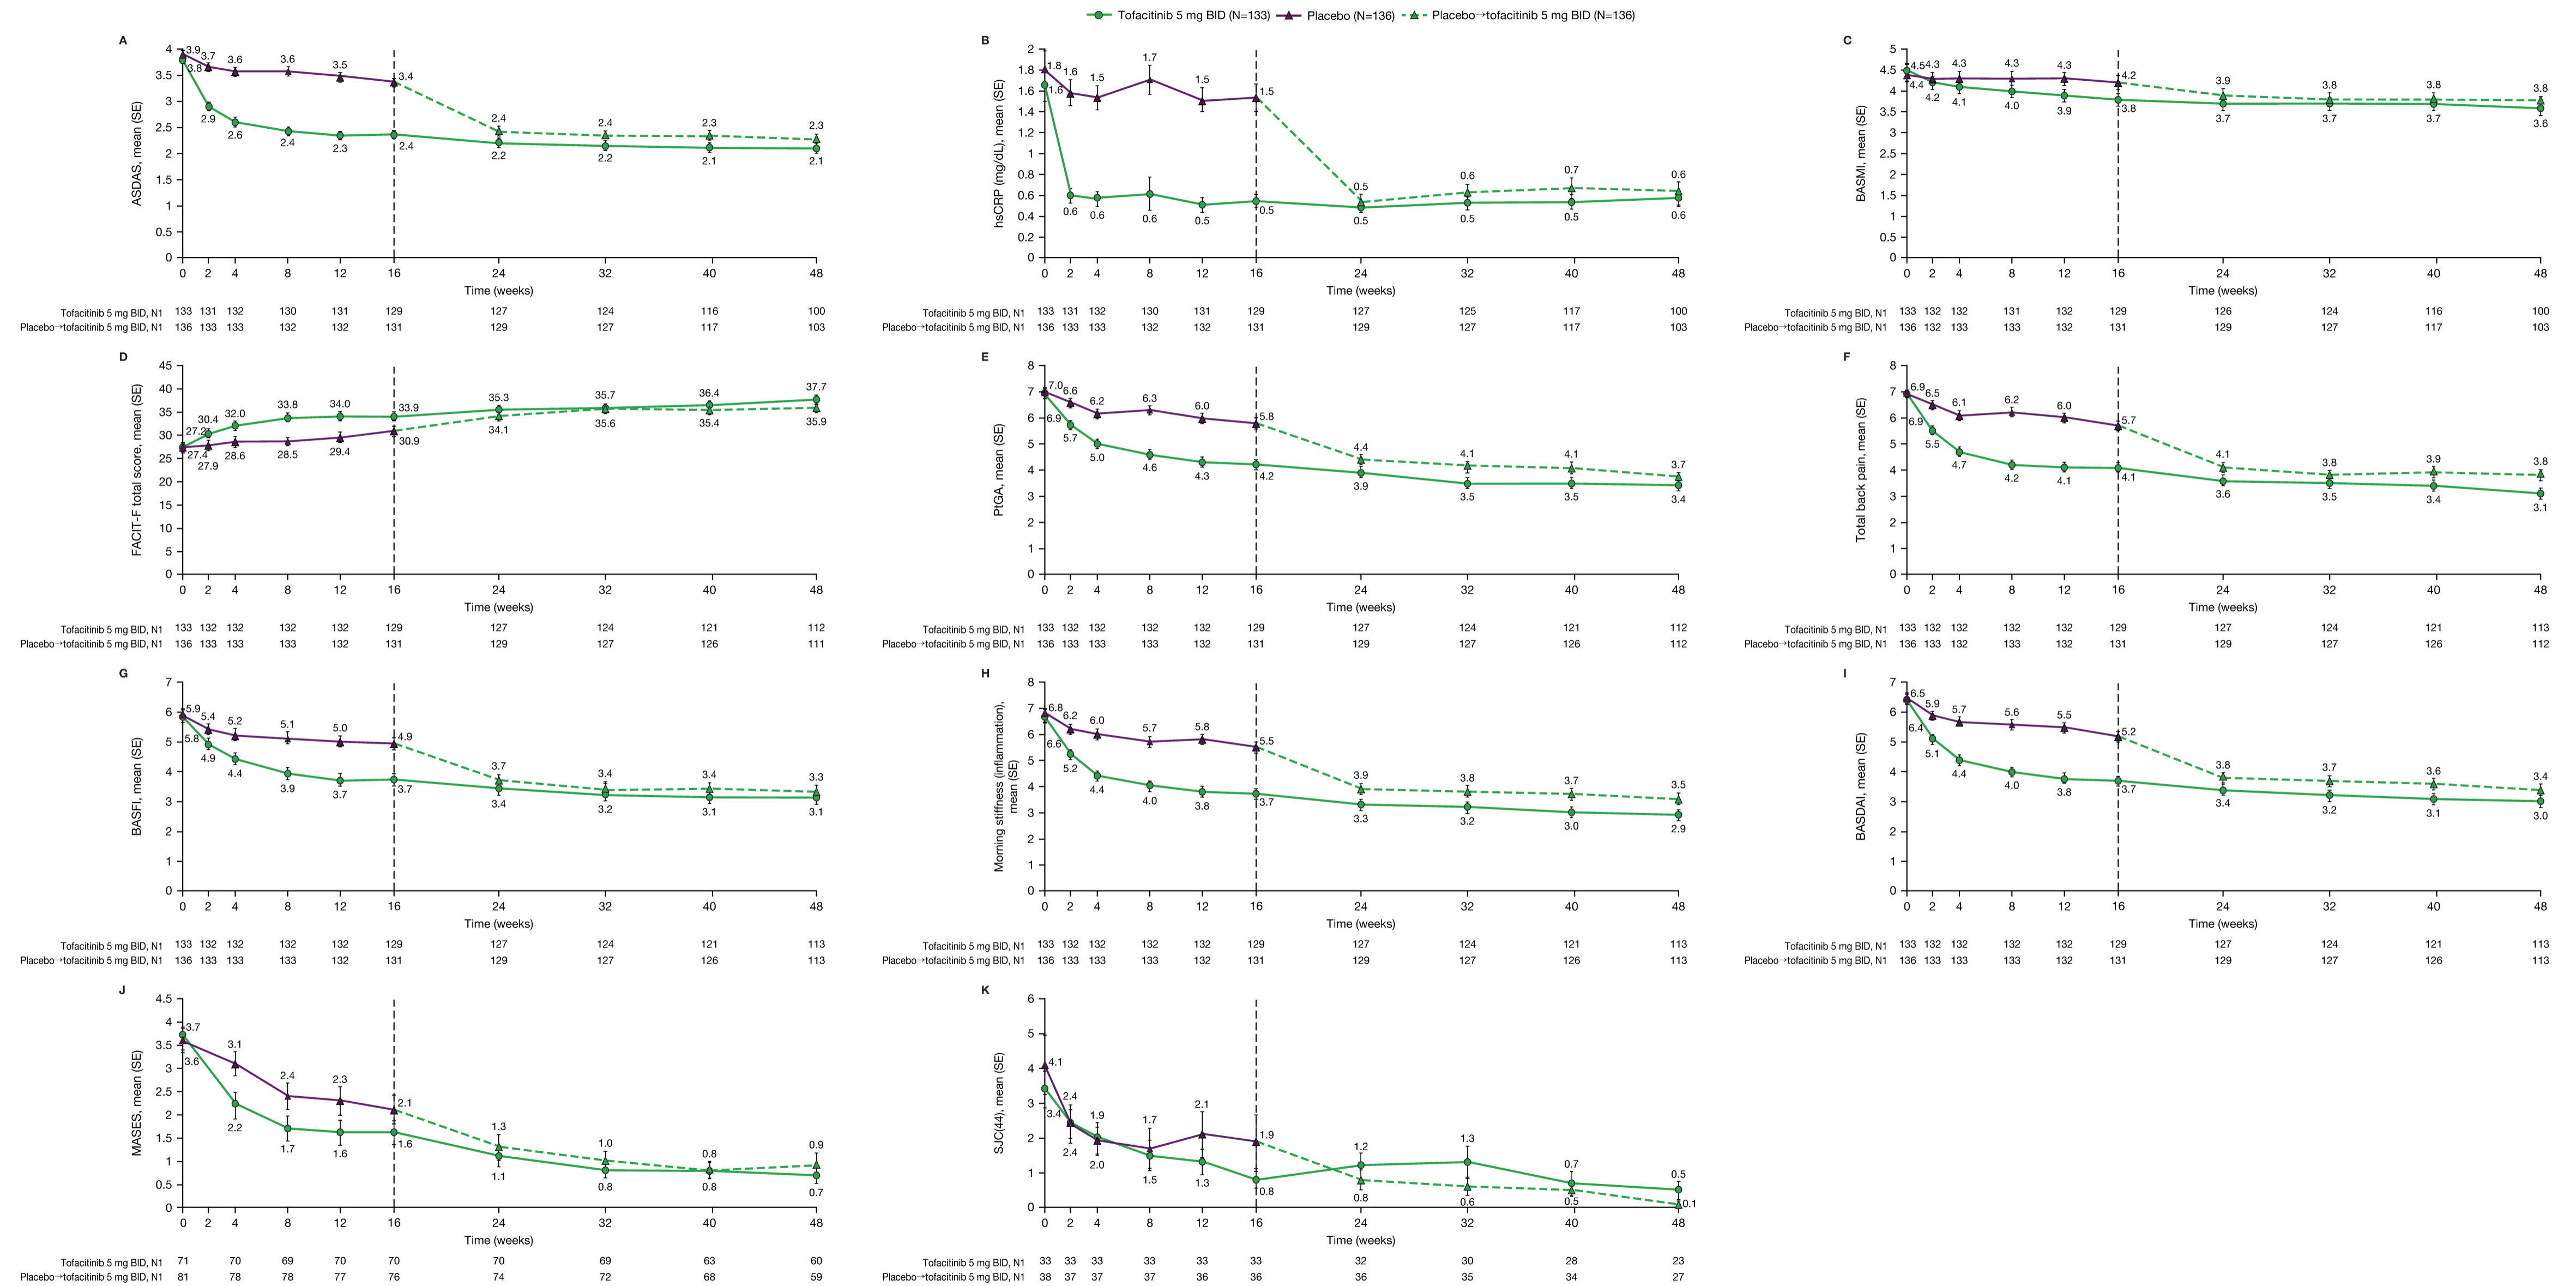

Data up to Week 16 are from the Week 16 analysis; data cut-off 19 December 2019; data snapshot 29 January 2020. Data for Weeks 24-48 are from the Week 48 final analysis. <sup>a</sup>Patients receiving placebo advanced to tofacitinib 5 mg BID at Week 16 (dashed line). <sup>b</sup>Analysed in patients with baseline MASES >0. <sup>c</sup>Analysed in patients with baseline SJC(44) >0. ASDAS, Ankylosing Spondylitis Disease Activity Score using hsCRP; BASDAI, Bath Ankylosing Spondylitis Disease Activity Index; BASFI, Bath Ankylosing Spondylitis Functional Index; BASMI, Bath Ankylosing Spondylitis Metrology Index; BID, twice daily; FACIT-F, Functional Assessment of Chronic Illness Therapy-Fatigue; hsCRP, high-sensitivity C-reactive protein; MASES, Maastricht Ankylosing Spondylitis Enthesitis Score; N, number of patients in full analysis set; N1, number of patients with observation at visit; PtGA, Patient Global Assessment of Disease Activity; SE, standard error; SJC(44), swollen joint count in 44 joints.

**Online supplementary figure S8** Mean laboratory values over time in patients receiving tofacitinib 5 mg BID or placebo→tofacitinib 5 mg BID<sup>a</sup> up to Week 48: (A) haemoglobin, (B) lymphocytes, (C) neutrophils, (D) AST, (E) ALT, (F) creatine kinase, (G) cholesterol,<sup>b</sup> (H) HDL cholesterol<sup>b</sup> and (I) LDL cholesterol.<sup>b</sup>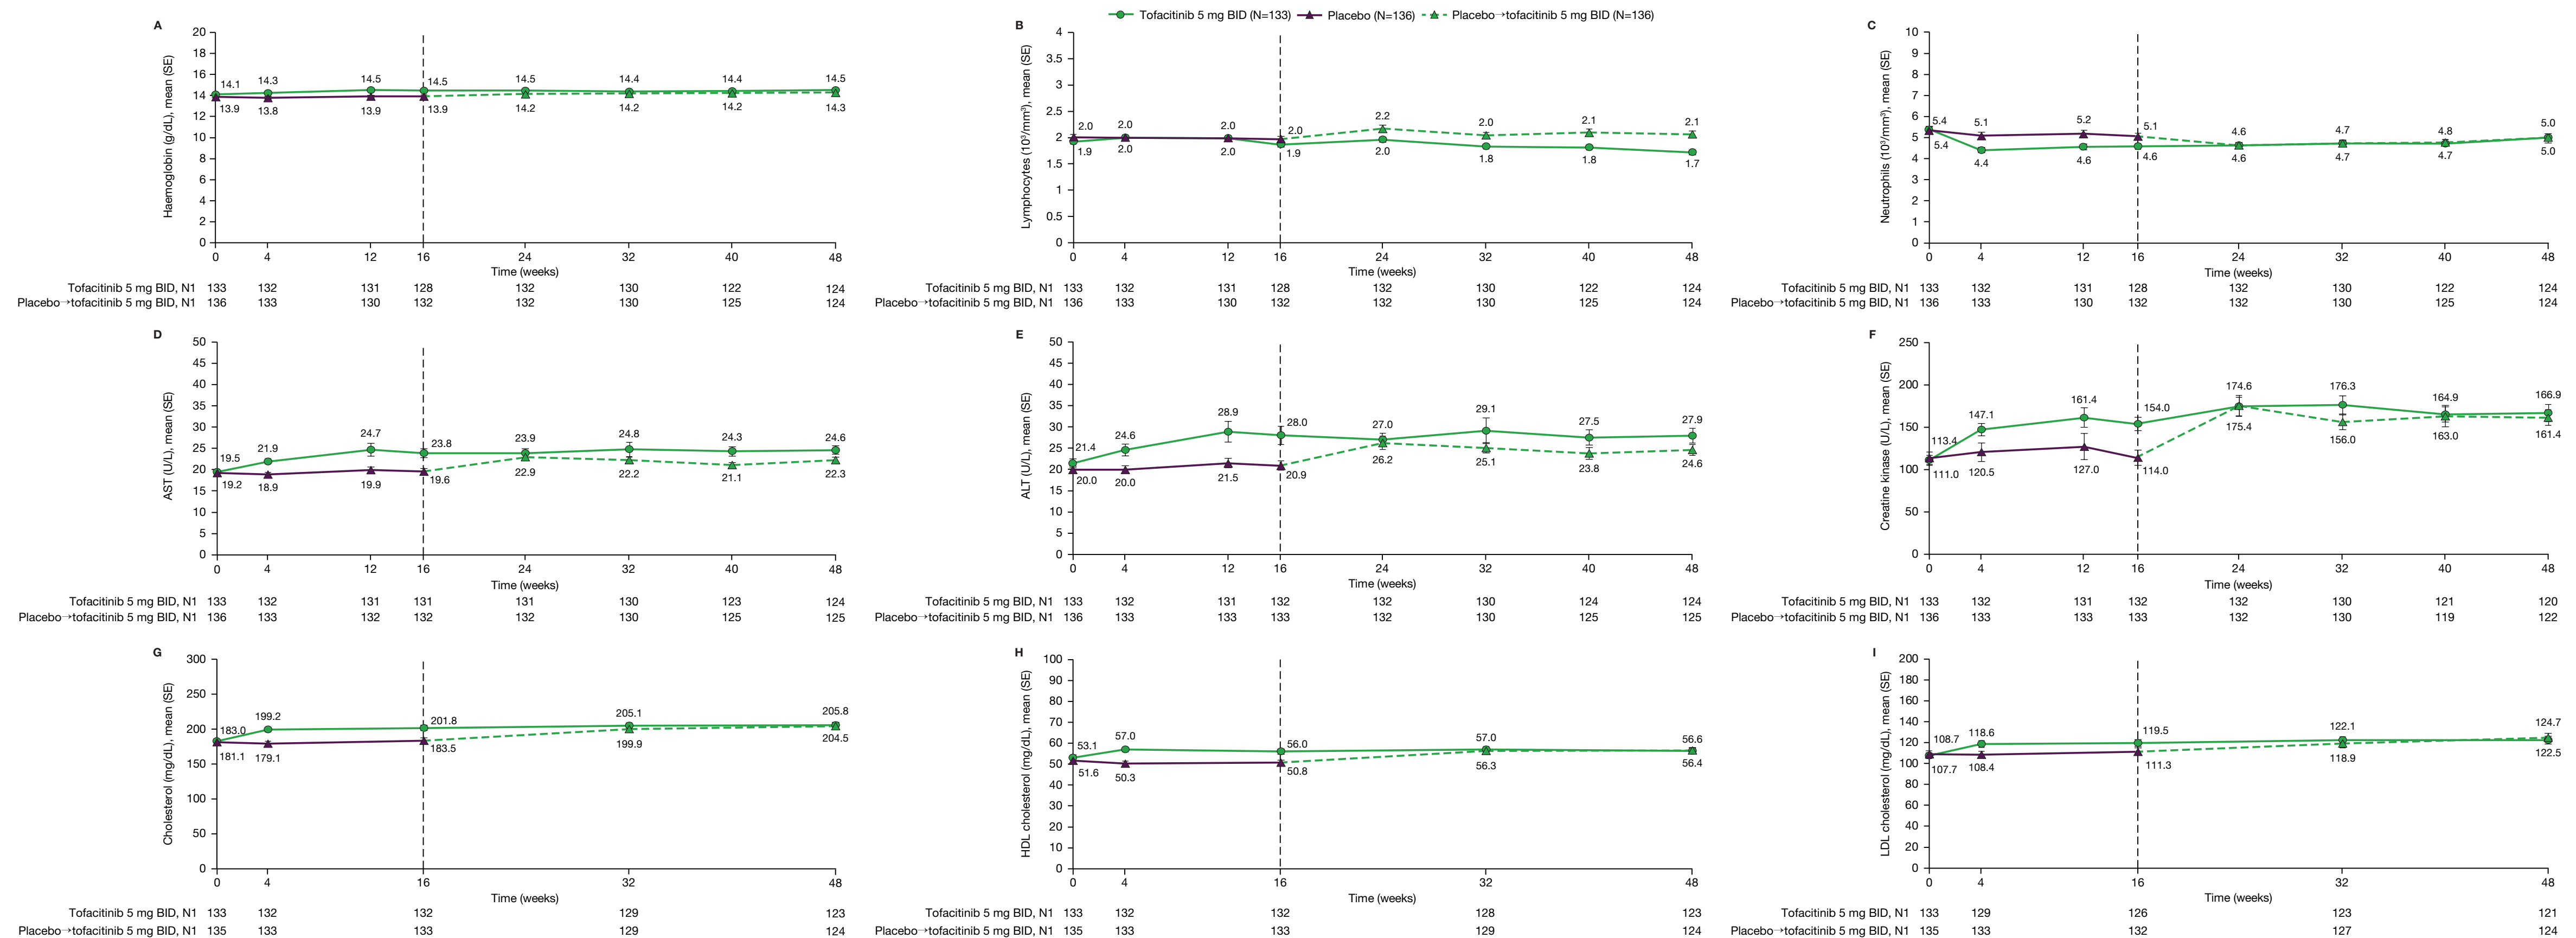

Data are from the Week 48 final analysis. <sup>a</sup>Patients receiving placebo advanced to tofacitinib 5 mg BID at Week 16 (dashed line). <sup>b</sup>Assessed in fasting state. ALT, alanine aminotransferase; AST, aspartate aminotransferase; BID, twice daily; HDL, high-density lipoprotein; LDL, low-density lipoprotein; N, number of patients in safety analysis set; N1, number of patients with observation at visit; SE, standard error.
