# Supplementary material for: Tofacitinib for the treatment of ankylosing spondylitis: a phase III, randomised, double-blind, placebo-controlled study
Source: PubMed Central journal article supplement — Ann Rheum Dis. 2021 Apr 27;80(8):1004–13. doi: 10.1136/annrheumdis-2020-219601 (PMC8292568; doi:10.1136/annrheumdis-2020-219601), 2021-04-27
Supplement: annrheumdis-2020-219601supp003.pdf [file annrheumdis-2020-219601supp003.pdf]

**Online supplementary table 1** Events in the open-label phase due to the COVID-19 pandemic: protocol deviations, discontinuation of study drug and withdrawal from study

| <b>Patients with events, n (%)</b>                                                                                                                                | <b>Tofacitinib<br/>5 mg BID<br/>(N=133)</b> | <b>Placebo→<br/>tofacitinib<br/>5 mg BID<br/>(N=136)</b> |
|-------------------------------------------------------------------------------------------------------------------------------------------------------------------|---------------------------------------------|----------------------------------------------------------|
| <b>Protocol deviations</b>                                                                                                                                        | 21 (15.8)                                   | 22 (16.2)                                                |
| Did not remain on stable dose of permitted concomitant medication as specified per protocol                                                                       | 0                                           | 2 (1.5)                                                  |
| Revised/updated ICD not signed at the first patient visit after the revised/approved ICD was available at site                                                    | 0                                           | 1 (0.7)                                                  |
| Dosing/administration error: patient temporarily stopped study drug administration for a longer duration than allowed after Week 16 visit                         | 0                                           | 2 (1.5)                                                  |
| Lab performed out of visit window                                                                                                                                 | 2 (1.5)                                     | 0                                                        |
| Lab samples after Week 16 visit were not collected for a study visit                                                                                              | 12 (9.0)                                    | 14 (10.3)                                                |
| Patient was a woman of childbearing potential, and pregnancy testing or FSH testing was not performed, or negative test result was not documented prior to dosing | 1 (0.8)                                     | 0                                                        |
| ECGs not performed at protocol-required time points or out of acceptable time window or not submitted to central vendor                                           | 7 (5.3)                                     | 9 (6.6)                                                  |
| Efficacy assessments/procedures not performed at appropriate visits                                                                                               | 11 (8.3)                                    | 14 (10.3)                                                |
| Patient-reported outcome questionnaires not performed at appropriate visits                                                                                       | 0                                           | 1 (0.7)                                                  |
| Procedure/test not performed as specified in the protocol                                                                                                         | 15 (11.3)                                   | 16 (11.8)                                                |
| Missing or incomplete visits or visits occurring outside of allowable visit windows                                                                               | 14 (10.5)                                   | 13 (9.6)                                                 |
| <b>Discontinued study drug</b>                                                                                                                                    | 0                                           | 3 (2.2)                                                  |
| <b>Withdrawal from study by patient</b>                                                                                                                           | 0                                           | 2 (1.5)                                                  |

Data are from the Week 48 final analysis.

All patients had completed the double-blind phase in December 2019. As such, there were no events due to COVID-19 in the double-blind phase. Throughout the study (double-blind and open-label phases), there were no cases of COVID-19.

BID, twice daily; COVID-19, coronavirus disease 2019; ECG, electrocardiogram; FSH, follicle-stimulating hormone; ICD, informed consent document; N, number of patients in safety analysis set; n, number of patients with event.
